# Supplementary material for: YhdP, TamB, and YdbH Are Redundant but Essential for Growth and Lipid Homeostasis of the Gram-Negative Outer Membrane
Source: PubMed Central journal article supplement (PMC8593681; doi:10.1128/mbio.02714-21), 2021-11-16
Supplement: mbio.02714-21-sf001.pdf [file mbio.02714-21-sf001.pdf]

**A**

| No | Hit                             | Prob | E-value | P-value | Score | SS   | Cols | Query  | HMM           | Template | HMM |
|----|---------------------------------|------|---------|---------|-------|------|------|--------|---------------|----------|-----|
| 1  | YP_026208.1 DUF3971-AsmA2 doma  | 99.6 | 5.3E-13 | 6.4E-18 | 112.4 | 21.2 | 144  | 1-145  | 30-174 (1266) | YhdP     |     |
| 2  | NP_416568.1 suppressor of OmpF  | 99.4 | 1.6E-11 | 2E-16   | 96.5  | 14.7 | 124  | 5-130  | 29-163 (617)  | AsmA     |     |
| 3  | NP_417981.2 putative inner mem  | 99.4 | 1.5E-11 | 1.9E-16 | 98.0  | 12.5 | 125  | 4-130  | 31-179 (686)  | YhjG     |     |
| 4  | NP_418112.1 putative inner mem  | 99.1 | 1.3E-08 | 1.6E-13 | 79.8  | 14.3 | 122  | 1-144  | 25-148 (569)  | YicH     |     |
| 5  | NP_418642.1 translocation and   | 98.7 | 6.2E-07 | 7.5E-12 | 76.8  | 12.6 | 117  | 5-128  | 29-149 (1259) | TamB     |     |
| 6  | NP_012064.1 Mdm31p [Saccharomy  | 97.7 | 0.0034  | 4.2E-08 | 50.2  | 12.5 | 135  | 5-143  | 145-322 (579) | Mdm31    |     |
| 7  | NP_415899.1 putative membrane-  | 97.6 | 0.00091 | 1.1E-08 | 56.2  | 9.5  | 131  | 5-145  | 28-177 (879)  | YdbH     |     |
| 8  | NP_014790.4 Mdm32p [Saccharomy  | 96.9 | 0.066   | 8E-07   | 43.7  | 11.5 | 132  | 10-143 | 171-318 (622) | Mdm32    |     |
| 9  | 6A9J_A Endolysin, Autophagy-rel | 81.7 | 13      | 0.00016 | 28.9  | 6.4  | 83   | 7-95   | 172-265 (389) | Atg2     |     |
| 10 | NP_013060.1 membrane morphogen  | 77.5 | 1.3E+02 | 0.0016  | 31.0  | 17.0 | 141  | 3-151  | 1-200 (3144)  | Vps13    |     |
| 11 | 6CBC_A Putative vacuolar prote  | 62.8 | 98      | 0.0012  | 23.5  | 12.4 | 135  | 7-149  | 6-190 (336)   | Vps13    |     |

**B**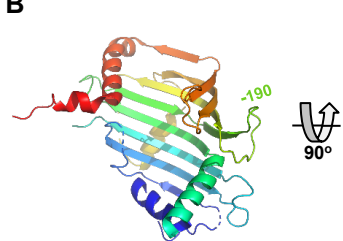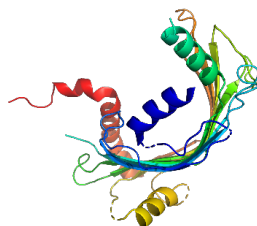**C**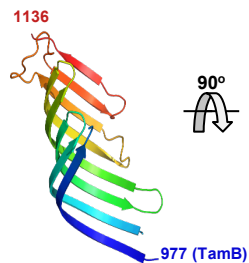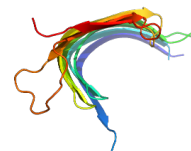**D**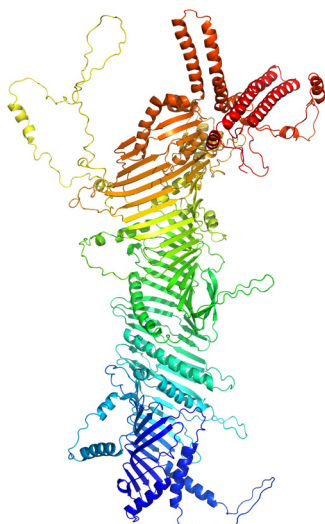

Atg2

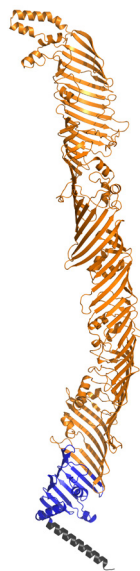

YhdP

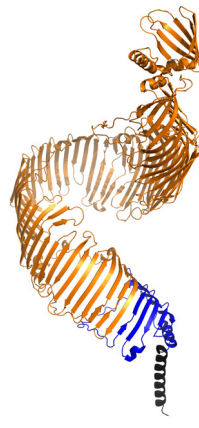

TamB

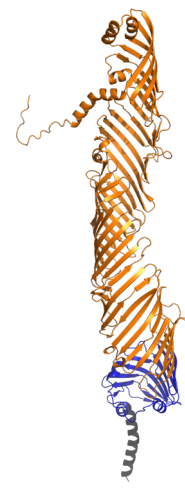

YdbH
