# Supplementary material for: YhdP, TamB, and YdbH Are Redundant but Essential for Growth and Lipid Homeostasis of the Gram-Negative Outer Membrane
Source: PubMed Central journal article supplement (PMC8593681; doi:10.1128/mbio.02714-21), 2021-11-16
Supplement: mbio.02714-21-sf002.pdf [file mbio.02714-21-sf002.pdf]

**A**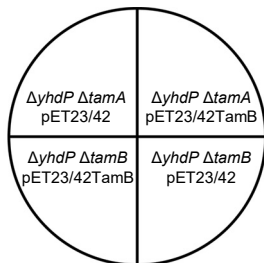**LB  
Amp**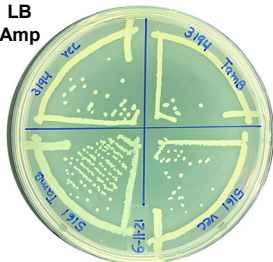**Mac**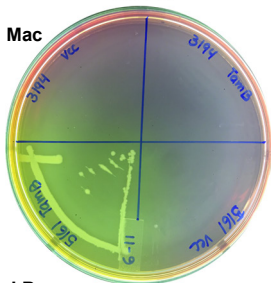**LB  
Bac**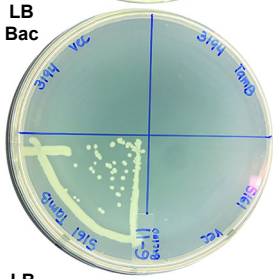**LB  
Em**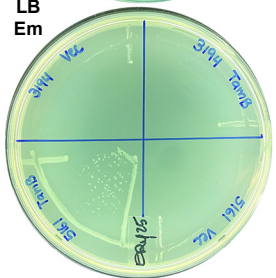**LB  
Van**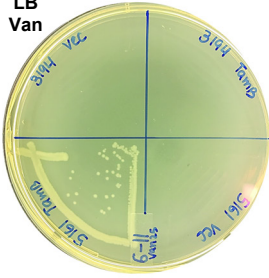**B**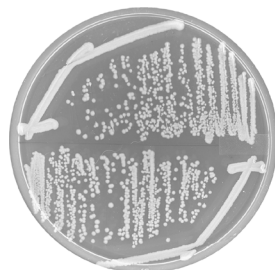**LB + ARA**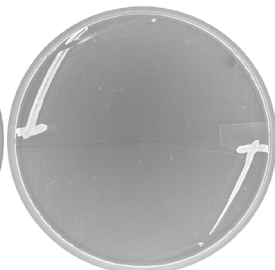**LB** $\Delta tamB \Delta ydbH$   
 $P_{BAD}::yhdP$  $\Delta tamA \Delta ydbH$   
 $P_{BAD}::yhdP$
