# Supplementary material for: YhdP, TamB, and YdbH Are Redundant but Essential for Growth and Lipid Homeostasis of the Gram-Negative Outer Membrane
Source: PubMed Central journal article supplement (PMC8593681; doi:10.1128/mbio.02714-21), 2021-11-16
Supplement: mbio.02714-21-st002.pdf [file mbio.02714-21-st002.pdf]

**Table S2. Conservation of TamB and YhdP homologs in endosymbionts does not correlate with LPS production.**

| Endosymbiont                                  | Genome accession | Total proteins | TamB homolog   | YhdP homolog   | LPS producer? <sup>a</sup> |
|-----------------------------------------------|------------------|----------------|----------------|----------------|----------------------------|
| <i>Wigglesworthia glossinidia</i>             | NC_016893.1      | 634            | WP_014354055.1 |                | Yes                        |
| <i>Baumannia cicadellinicola str. Hc</i>      | CP000238.1       | 595            | ABF14103.1     |                | No                         |
| <i>Endosymbiont of Ctenarytaina eucalypti</i> | CP003546.1       | 719            | AFP85202.1     |                | No                         |
| <i>Vesicomysocius okutanii HA</i>             | CF_000010405.1   | 948            |                | WP_148178872.1 | Yes                        |
| <i>Buchnera aphidicola sp. APS</i>            | BA000003.2       | 574            | BAB12807.1     |                | No                         |
| <i>Buchnera aphidicola str. Bp</i>            | AE016826.1       | 507            | Q89AY7.1       |                | No                         |
| <i>Blochmannia floridanus</i>                 | GCA_000043285.1  | 583            | CAD83613.1     |                | Yes                        |

<sup>a</sup>The presence or absence of LPS was determined by searching for *lpx* (LPS synthesis) and *lpt* (LPS transport) genes in their respective annotated genomes.
